# Supplementary material for: Bacterial diversity in saliva and oral health-related conditions: the Hisayama Study
Source: PubMed Central journal article supplement (PMC4764907; doi:10.1038/srep22164), 2016-02-24
Supplement: srep22164-s1.pdf [file srep22164-s1.pdf]

# Bacterial diversity in saliva and oral health-related conditions: the Hisayama Study

5 Toru Takeshita<sup>1</sup>, Shinya Kageyama<sup>1</sup>, Michiko Furuta<sup>1</sup>, Hidenori Tsuboi<sup>1</sup>, Kenji  
Takeuchi<sup>1</sup>, Yukie Shibata<sup>1</sup>, Yoshihiro Shimazaki<sup>2</sup>, Sumio Akifusa<sup>3</sup>, Toshiharu  
Ninomiya<sup>4</sup>, Yutaka Kiyohara<sup>5</sup>, Yoshihisa Yamashita<sup>1\*</sup>

<sup>1</sup>Section of Preventive and Public Health Dentistry, Division of Oral Health, Growth and  
Development, Kyushu University Faculty of Dental Science, Fukuoka, Japan,  
10 <sup>2</sup>Department of Preventive Dentistry and Dental Public Health, School of Dentistry,  
Aichi-Gakuin University, Nagoya, Japan, <sup>3</sup>Department of Oral Health Management,  
School of Oral Health Science, Kyushu Dental College, Kitakyushu, Japan, <sup>4</sup>Division of  
Research Management, Center for Cohort Studies, Graduate School of Medical  
Sciences, Kyushu University, Fukuoka, Japan, <sup>5</sup>Department of Environmental Medicine,  
15 Graduate School of Medical Sciences, Kyushu University, Fukuoka, Japan

Correspondence and requests for materials should be addressed to Y.Y.

## **Supplemental Figure Legend**

Supplemental Figure 1. Rarefaction curves for a number of observed operational taxonomic units (OTUs) per sample. Mean number of observed OTUs almost reached a plateau by 5,000 sequence reads. The error bars indicate the standard deviation.

# Number of observed OTUs per sample

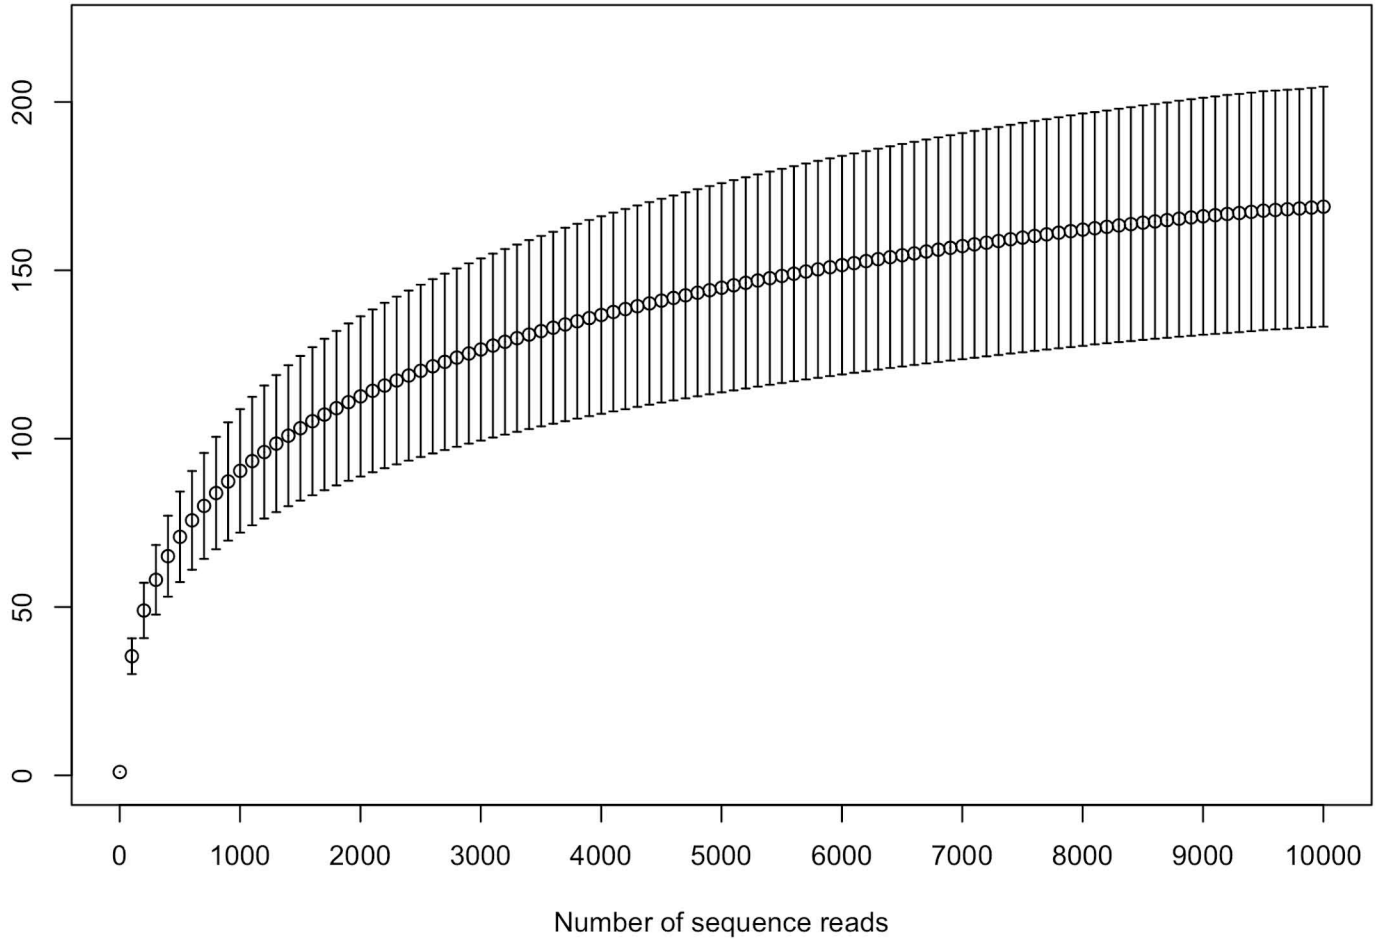

## Supplemental Table

Table S1. Relative abundances of 22 dominant core operational taxonomic units (OTUs) in each community type.

|    |       | Community type    |                   | <i>P</i> value <sup>a</sup> | Bacterial phylum<br>corresponding to each OTU | Bacterial species<br>corresponding to each OTU |
|----|-------|-------------------|-------------------|-----------------------------|-----------------------------------------------|------------------------------------------------|
|    |       | Type I            | Type II           |                             |                                               |                                                |
| 5  | OTU1  | <b>2.9 ± 1.7</b>  | 1.5 ± 0.9         | <0.001                      | <i>Firmicutes</i>                             | <i>Veillonella parvula</i> (161)               |
|    | OTU2  | 0.7 ± 1.1         | <b>4.3 ± 3.6</b>  | <0.001                      | <i>Bacteroidetes</i>                          | <i>Porphyromonas</i> sp. (279)                 |
|    | OTU3  | <b>2.2 ± 2.4</b>  | 0.4 ± 0.6         | <0.001                      | <i>Bacteroidetes</i>                          | <i>Prevotella histicola</i> (298)              |
|    | OTU4  | <b>1.0 ± 1.2</b>  | 0.9 ± 1.1         | 0.009                       | <i>Bacteroidetes</i>                          | <i>Alloprevotella</i> sp. (308)                |
|    | OTU5  | <b>10.5 ± 6.7</b> | 7.1 ± 4.7         | <0.001                      | <i>Bacteroidetes</i>                          | <i>Prevotella melaninogenica</i> (469)         |
| 10 | OTU6  | <b>3.2 ± 1.8</b>  | 1.6 ± 1.0         | <0.001                      | <i>Firmicutes</i>                             | <i>Veillonella atypica</i> (524)               |
|    | OTU7  | 3.0 ± 2.0         | 3.1 ± 1.9         | 0.055                       | <i>Firmicutes</i>                             | <i>Granlicatella adiacens</i> (534)            |
|    | OTU8  | <b>1.9 ± 2.9</b>  | 1.0 ± 1.4         | <0.001                      | <i>Actinobacteria</i>                         | <i>Rothia dentocariosa</i> (587)               |
|    | OTU9  | 2.7 ± 3.1         | <b>15.7 ± 8.7</b> | <0.001                      | <i>Proteobacteria</i>                         | <i>Neisseria flavescens</i> (610)              |
|    | OTU10 | 4.1 ± 3.2         | <b>4.7 ± 3.1</b>  | <0.001                      | <i>Firmicutes</i>                             | <i>Streptococcus mitis</i> (677)               |
| 15 | OTU11 | <b>10.4 ± 8.3</b> | 7.5 ± 5.5         | <0.001                      | <i>Actinobacteria</i>                         | <i>Rothia mucilaginoso</i> (681)               |
|    | OTU12 | 0.9 ± 1.4         | <b>1.8 ± 1.8</b>  | <0.001                      | <i>Proteobacteria</i>                         | <i>Haemophilus parainfluenzae</i> (718)        |
|    | OTU13 | <b>2.7 ± 2.2</b>  | 0.9 ± 0.9         | <0.001                      | <i>Firmicutes</i>                             | <i>Streptococcus parasanguinis</i> (721)       |
|    | OTU14 | <b>5.1 ± 4.3</b>  | 1.6 ± 1.9         | <0.001                      | <i>Firmicutes</i>                             | <i>Streptococcus salivarius</i> (755)          |
|    | OTU15 | 1.4 ± 1.3         | <b>2.1 ± 1.5</b>  | <0.001                      | <i>Firmicutes</i>                             | <i>Gemella sanguinis</i> (757)                 |
| 20 | OTU16 | <b>1.8 ± 2.6</b>  | 1.0 ± 1.6         | <0.001                      | <i>Actinobacteria</i>                         | <i>Actinomyces graevenitzii</i> (866)          |
|    | OTU17 | 0.8 ± 1.0         | <b>1.3 ± 1.1</b>  | <0.001                      | <i>Firmicutes</i>                             | Genus <i>Streptococcus</i>                     |
|    | OTU18 | 1.0 ± 1.3         | <b>2.1 ± 1.6</b>  | <0.001                      | <i>Firmicutes</i>                             | Genus <i>Streptococcus</i>                     |
|    | OTU19 | <b>3.7 ± 3.3</b>  | 3.0 ± 2.8         | <0.001                      | <i>Actinobacteria</i>                         | Genus <i>Actinomyces</i>                       |
|    | OTU20 | <b>2.0 ± 2.4</b>  | 0.3 ± 0.5         | <0.001                      | <i>Bacteroidetes</i>                          | Genus <i>Prevotella</i>                        |
| 25 | OTU21 | 3.5 ± 3.1         | <b>3.8 ± 3.0</b>  | 0.020                       | <i>Firmicutes</i>                             | Genus <i>Streptococcus</i>                     |
|    | OTU22 | <b>2.6 ± 2.4</b>  | 0.9 ± 1.0         | <0.001                      | <i>Firmicutes</i>                             | Genus <i>Streptococcus</i>                     |

<sup>a</sup>Significant differences between two community types were evaluated by using Student's t-test. The values that were significantly higher than the other community are shown in boldface.
